# Supplementary material for: Large-volume en-bloc staining for electron microscopy-based connectomics
Source: PubMed Central journal article supplement (PMC4532871; doi:10.1038/ncomms8923), 2015-08-03
Supplement: ncomms8923-s1.pdf [file ncomms8923-s1.pdf]

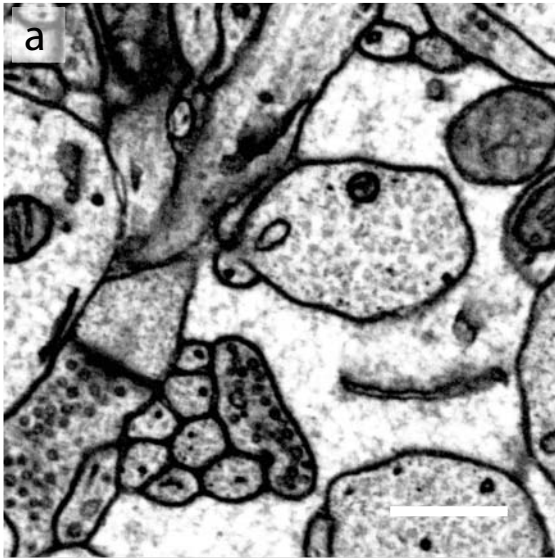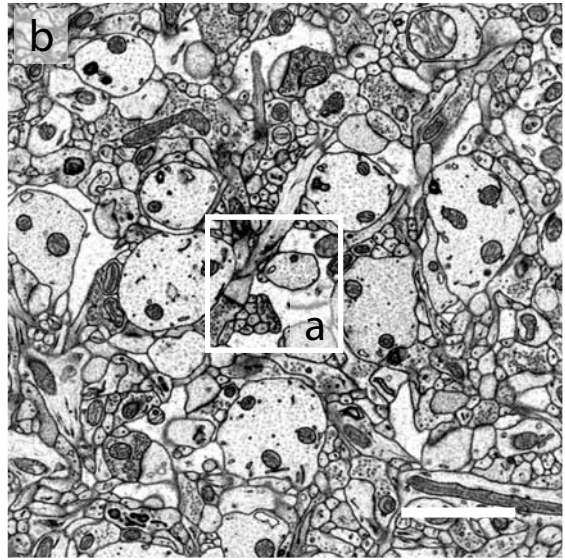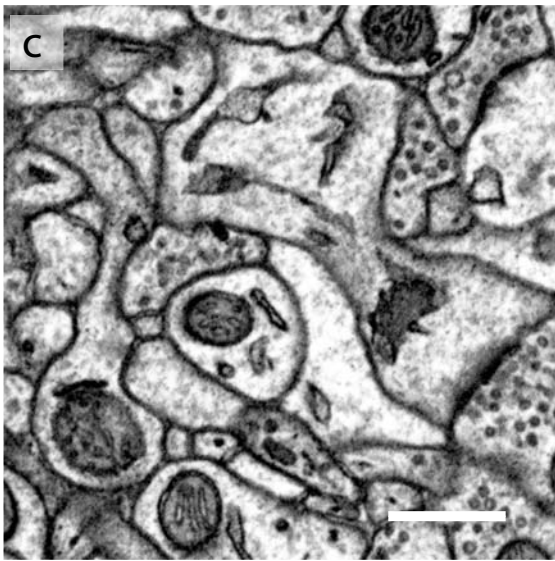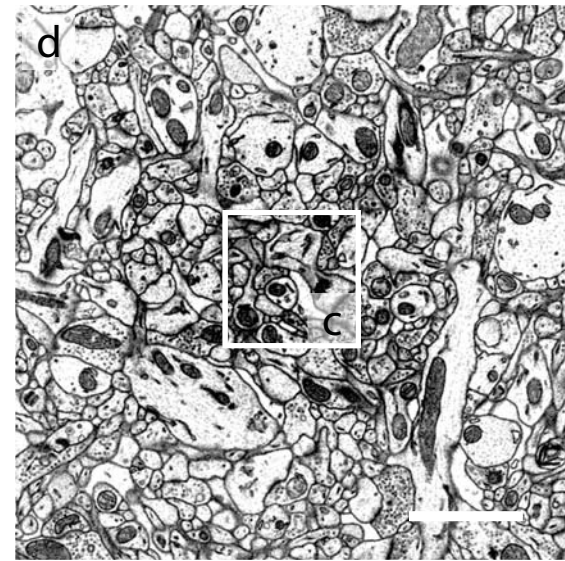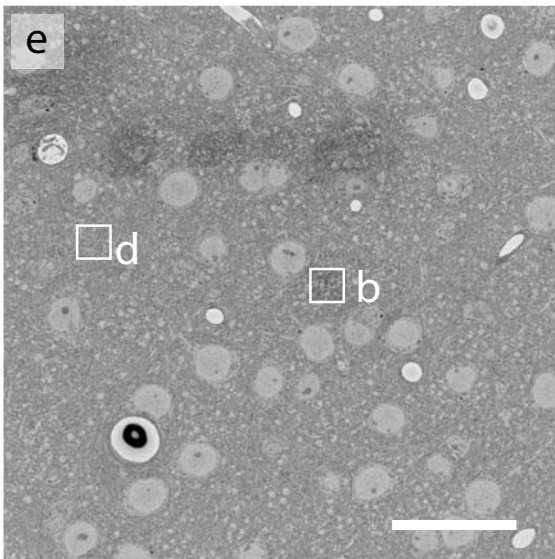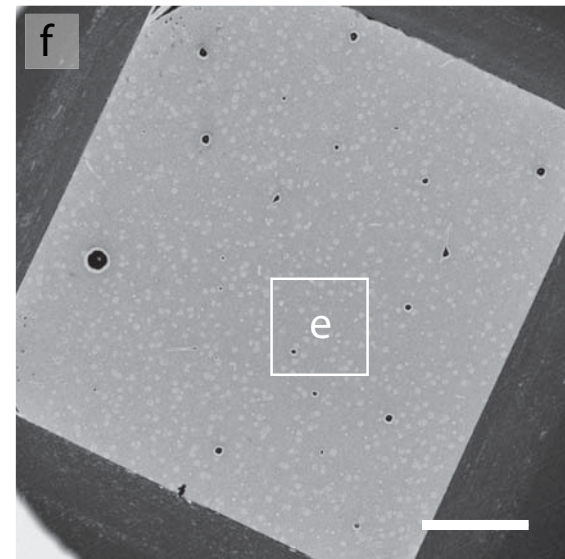

Hua, Laserstein & Helmstaedter  
Suppl. Fig. 1

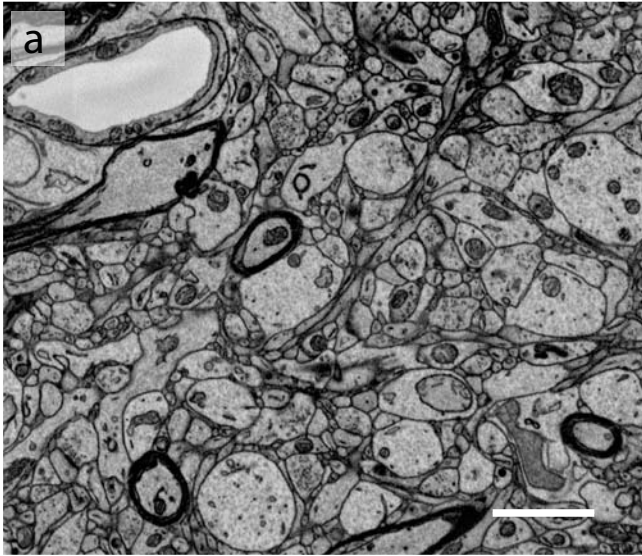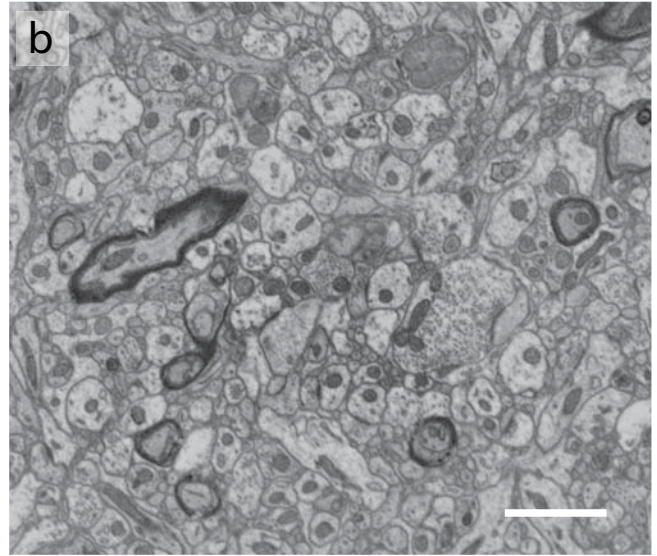

Hua, Laserstein & Helmstaedter  
Suppl. Fig. 2

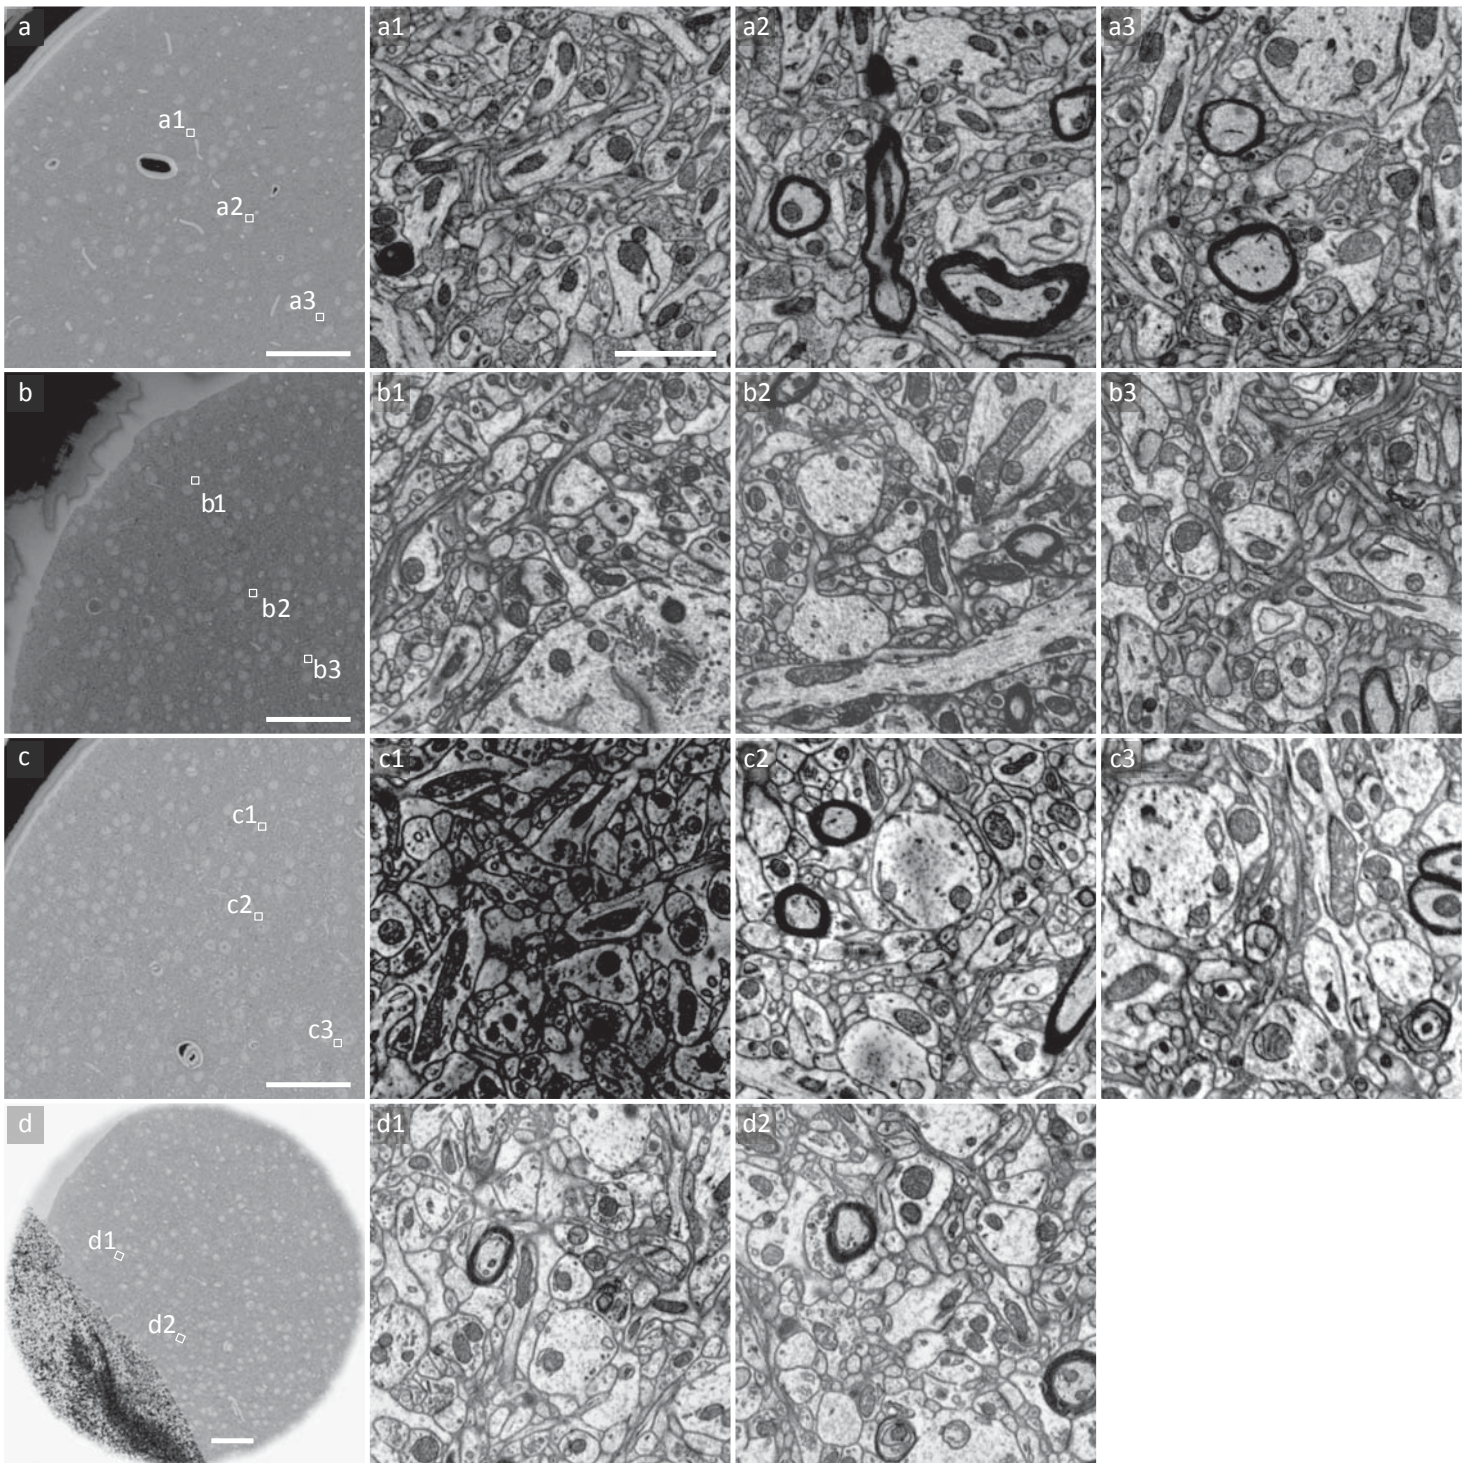

Hua Laserstein Helmstaedter  
Suppl. Fig. 3

| staining protocol                       |                                                                   |                                                                                          |                                          |                                     |                                           |                                             |
|-----------------------------------------|-------------------------------------------------------------------|------------------------------------------------------------------------------------------|------------------------------------------|-------------------------------------|-------------------------------------------|---------------------------------------------|
| incubation steps                        | Briggman (Fig. 1b)                                                | Holcomb (Fig. 1c)                                                                        | Mikula (Fig. 1d)                         | OTO                                 | OPTO (Fig. 3g)                            | Hua (Fig. 1e)                               |
| 1.                                      | 2% OsO <sub>4</sub> ,<br>2.5% ferrocyanide,<br>0.15 M Cac, pH 7.4 | 2% OsO <sub>4</sub> , 2 mM CaCl <sub>2</sub><br>1.5% ferrocyanide,<br>0.15 M Cac, pH 7.4 | 1 % periodic acide,<br>0.1 M Cac, pH 7.4 | 2% OsO <sub>4</sub> ,<br>unbuffered | 2% OsO <sub>4</sub> ,<br>unbuffered       | 2% OsO <sub>4</sub> ,<br>0.15 M Cac, pH 7.4 |
|                                         | 1.5 h @ rt                                                        | 1.5 h @ rt                                                                               | 1.5 h @ 4 °C                             | 1.5 h @ rt                          | 1.5 h @ rt                                | 1.5 h @ rt                                  |
| No wash                                 |                                                                   |                                                                                          |                                          |                                     |                                           |                                             |
| 2                                       |                                                                   |                                                                                          |                                          |                                     | 1 % periodic acide,<br>0.15 M Cac, pH 7.4 | 2.5% ferrocyanide,<br>0.15 M Cac, pH 7.4    |
|                                         |                                                                   |                                                                                          |                                          |                                     | 1.5 h @ 4 °C                              | 1.5 h @ rt                                  |
| 0.5 h wash in water x 2                 |                                                                   |                                                                                          |                                          |                                     |                                           |                                             |
| 3                                       | 1% TCH,<br>unbuffered                                             | 1% TCH,<br>unbuffered                                                                    | 1% TCH,<br>0.1 M Cac, pH 7.4             | 1% TCH,<br>unbuffered               | 1% TCH,<br>0.1 M Cac, pH 7.4              | 1% TCH,<br>unbuffered                       |
|                                         | 0.75 h @ 50 °C                                                    | 0.75 h @ rt                                                                              | 0.75 h @ 50 °C                           | 0.75 h @ rt                         | 0.75 h @ 50 °C                            | 0.75 h @ 40 °C                              |
| 0.5 h wash in water x 2                 |                                                                   |                                                                                          |                                          |                                     |                                           |                                             |
| 4                                       | 2% OsO <sub>4</sub> ,<br>unbuffered                               | 2% OsO <sub>4</sub> ,<br>unbuffered                                                      | 2% OsO <sub>4</sub> ,<br>unbuffered      | 2% OsO <sub>4</sub> ,<br>unbuffered | 2% OsO <sub>4</sub> ,<br>unbuffered       | 2% OsO <sub>4</sub> ,<br>unbuffered         |
|                                         | 1.5 h @ rt                                                        | 1.5 h @ rt                                                                               | 1.5 h @ rt                               | 1.5 h @ rt                          | 1.5 h @ rt                                | 1.5 h @ rt                                  |
| 0.5 h wash in water x 2                 |                                                                   |                                                                                          |                                          |                                     |                                           |                                             |
| 5                                       | 1 % uranyl acetate,<br>unbuffered                                 | 1% uranyl acetate,<br>unbuffered                                                         | 1% uranyl acetate,<br>unbuffered         | 1 % uranyl acetate,<br>unbuffered   | 1 % uranyl acetate,<br>unbuffered         | 1% uranyl acetate,<br>unbuffered            |
|                                         | 2 h @ 50 °C                                                       | overnight @ 4 °C                                                                         | 2 h @ 50 °C                              | 2 h @ 50 °C                         | 2 h @ 50 °C                               | overnight @ 4 °C,<br>2 h @ 50 °C            |
| 0.5 h wash in water x 2                 |                                                                   |                                                                                          |                                          |                                     |                                           |                                             |
| 6                                       | Lead aspartate,<br>pH 5.0                                         | Lead aspartate,<br>pH 5.5                                                                | Lead aspartate,<br>pH 5.0                | Lead aspartate,<br>pH 5.0           | Lead aspartate,<br>pH 5.0                 | Lead aspartate,<br>pH 5.0                   |
|                                         | 2 h @ 50 °C                                                       | 2 h @ 60 °C                                                                              | 2 h @ 50 °C                              | 2 h @ 50 °C                         | 2 h @ 50 °C                               | 2 h @ 50 °C                                 |
| 0.5 h wash in water x 2                 |                                                                   |                                                                                          |                                          |                                     |                                           |                                             |
| dehydration, infiltration and embedding |                                                                   |                                                                                          |                                          |                                     |                                           |                                             |

## Supplementary Table 1

Detailed comparison of staining steps in employed staining protocols (Fig. 1).

| Experimenter     | Species, brain region | Exp. ID   | Exp. Date  | Variation to standard protocol as in methods                                          | Ultrastructural results                                                                                          | Screening results figure |
|------------------|-----------------------|-----------|------------|---------------------------------------------------------------------------------------|------------------------------------------------------------------------------------------------------------------|--------------------------|
| Hua              | Mouse S1 cortex       | scYH0009  | 2013/12/11 | rOTO (ref. 18)                                                                        | Poor penetration, good ultrastructure preservation, good membrane contrast                                       | Fig. 1b                  |
| Hua              | Mouse S1 cortex       | scYH0010  | 2013/12/11 | rOTO (ref. 19)                                                                        | Poor penetration, good ultrastructure preservation, good membrane contrast                                       | Fig. 1c                  |
| Hua              | Mouse S1 cortex       | scYH0053  | 2014/01/13 | PATCO (ref. 2)                                                                        | Good penetration, poor ultrastructure preservation, poor membrane contrast, charging                             | Fig. 1d                  |
| Hua              | Mouse S1 cortex       | scYH0056  | 2014/01/22 | No variation                                                                          | Penetration, contrast, ultrastructure (all good ) resin hardness (35 nm cut at border, soft core)                | Fig. 1e<br>Suppl Fig 2a  |
| Hua & Laserstein | Mouse S1 cortex       | scPL0052  | 2014/08/14 | No accelerator during initial infiltration, Add accelerator on the next day           | Penetration, contrast, ultrastructure (all good ) resin hardness (30 nm cut)                                     | Traceability test        |
| Hua              | Mouse s1 cortex       | scYH1059  | 2014/01/22 | No 2h incubation in UA at 50°C                                                        | Good penetration, good ultrastructure preservation, slightly low membrane contrast                               | Suppl Fig 2b             |
| Hua              | Mouse S1 cortex       | scYH1012  | 2015/05/07 | No accelerator during initial infiltration, Added accelerator on the next day instead | Penetration, contrast, ultrastructure (all good )                                                                | Fig. 2<br>Suppl Fig. 1   |
| Laserstein       | Mouse S1 cortex       | scPL0066  | 2014/08/25 | No variation                                                                          | Penetration, contrast, ultrastructure (all good ) resin hardness (not tested)                                    | Suppl Fig. 3a            |
| Gour             | Mouse S1 cortex       | scAG0008  | 2014/10/20 | No variation                                                                          | Penetration, contrast, ultrastructure (all good ) resin hardness (not tested)                                    | Suppl Fig. 3b            |
| Karimi           | Mouse PPC             | ppcAK0004 | 2014/10/21 | No variation                                                                          | Penetration, contrast, ultrastructure (all good ), charging effect at the edge area, resin hardness (not tested) | Suppl Fig. 3c            |
| Karimi           | Mouse PPC             | ppcAK0003 | 2014/10/21 | No variation                                                                          | Penetration, contrast, ultrastructure (all good ) resin hardness (not tested)                                    | Suppl Fig. 3d            |

## Supplementary Table 2

Summary of staining experiments reported in the paper for assessing the variability of staining quality over cortex areas and experimentalists.
